# Supplementary material for: The staggered retreat of grounded ice in Ross Sea, Antarctica since the LGM
Source: Copernicus journal article supplement (doi:10.5194/egusphere-2023-1397), 2023-07-28
Supplement: Supplementary file 1 [file egusphere-2023-1397-supplement.zip]

**Supplemental Table 1: Seismic surveys used in study**

| Survey   | Type | Source                            | Fold | Processing                                                                                                     | Number of Lines | Year | Length (km)                   |
|----------|------|-----------------------------------|------|----------------------------------------------------------------------------------------------------------------|-----------------|------|-------------------------------|
| ATC82B   | MCS  | 35.54 L Bolt-type airgun array    | 48   | Conventional 24-fold, full-trace AGC, vertical stack 2:1                                                       | 7               | 1982 | 1790                          |
| BG80     | MCS  | 23.45 L Tuned “U” 24 airgun array | 24   | Predictive deconvolution, 24-fold stack, adaptive deconvolution, full-trace AGC                                | 26              | 1980 | 6742                          |
| IT88     | MCS  | 45.16 L airgun array              | 24   | FK filtering, deconvolution before stack, deconvolution after stack                                            | 6               | 1988 | 2324                          |
| IT89RS   | MCS  | 45.16 L airgun array              | 30   | Reformat, trace sum, resample, amplitude recovery gather, deconvolution, NMO, mute, stack, decimation, balance | 24              | 1989 | 4131                          |
| IT90RS   | MCS  | 22.5 L airgun array               | 60   | Reformat, trace sum, resample, amplitude recovery gather, deconvolution, NMO, mute, stack, decimation, balance | 31              | 1990 | 640                           |
| IT94     | MCS  | 71.5 L airgun array               | 30/3 | Reformat, trace sum, resample, amplitude recovery gather, deconvolution, NMO, mute, stack, decimation, balance | 5               | 1994 | 852 (30 fold)<br>673 (3 fold) |
| L284AN   | MCS  | 21.5 L airgun array               | 24   | Demultiplex, gain recovery, velocity analysis, normal moveout, filter and post-stack gain, display             | 19              | 1984 | 2405                          |
| NBP9601  | MCS  |                                   |      |                                                                                                                | 50              | 1996 | 1206                          |
| NBP0301  | MCS  |                                   |      |                                                                                                                | 40              | 2003 | 2093                          |
| NBP0301A | SCS  |                                   |      |                                                                                                                | 46              | 2003 | 1480                          |
| NBP0306  | MCS  |                                   |      |                                                                                                                | 41              | 2003 | 1217                          |
| NBP0401  | MCS  |                                   |      |                                                                                                                | 65              | 2004 | 2839                          |
| NBP0701  | MCS  |                                   |      |                                                                                                                | 25              | 2007 | 2657                          |

|         |                  |                             |       |                                                                                                                                                                                                                                                                                                                                             |    |      |      |
|---------|------------------|-----------------------------|-------|---------------------------------------------------------------------------------------------------------------------------------------------------------------------------------------------------------------------------------------------------------------------------------------------------------------------------------------------|----|------|------|
| NBP0802 | SCS              |                             |       |                                                                                                                                                                                                                                                                                                                                             | 7  | 2008 | 525  |
| NBP1502 | MCS              |                             |       |                                                                                                                                                                                                                                                                                                                                             | 4  | 2015 | 2109 |
| PD90    | SCS              |                             |       |                                                                                                                                                                                                                                                                                                                                             | 53 | 1990 | 5545 |
| SEV87   | MCS              | 10.0 L bolt-type airgun     | 24    | Conventional 24-Fold, vertical stack 2:1, full-trace AGC                                                                                                                                                                                                                                                                                    | 15 | 1987 | 4439 |
| SEV89   | MCS              | 7.5 L bolt-type airgun      | 48    | Conventional 24-Fold, vertical stack 2:1, full-trace AGC                                                                                                                                                                                                                                                                                    | 11 | 1989 | 3160 |
| TH82    | MCS              | 9.2 L bolt-type airgun      | 6     | Conventional 6-Fold, full-trace AGC, vertical stack 4:1                                                                                                                                                                                                                                                                                     | 8  | 1982 | 1495 |
| TH91    | MCS              | 13.11 L water gun array     | 6     | Demultiplex, processing sample interval, time zero adjustment, band pass filter, noise trace edit, CDP sort, spherical divergence compensation, AGC, deconvolution, velocity analysis, normal moveout, CDP stack, post stack deconvolution, time variant band pass filter, datum correction, trace balance, two trace mixing, trace scaling | 11 | 1991 | 2720 |
| TH92    | MCS              | 7.37 L GI gun array         | 12/24 | Demultiplex, processing sample interval, time zero adjustment, band pass filter, noise trace edit, CDP sort, spherical divergence compensation, AGC, deconvolution, velocity analysis, normal moveout, CDP stack, post stack deconvolution, time variant band pass filter, datum correction, trace balance, two trace mixing, trace scaling | 8  | 1992 | 2143 |
| TH95    | MCS              | 9.83 — 13.76 L GI gun array | 48    | Demultiplex, two traces summation, band pass filter, noise trace edit, CDP sort, spherical divergence compensation, AGC, deconvolution, velocity analysis, normal moveout, CDP stack, post stack deconvolution, time variant band pass filter, datum correction, trace balance, two trace vertical stack, trace scaling                     | 8  | 1995 | 1206 |
| NBP9307 | SCS (Paper only) |                             |       |                                                                                                                                                                                                                                                                                                                                             |    | 1993 | 4713 |

|         |                        |                                  |  |  |  |      |      |
|---------|------------------------|----------------------------------|--|--|--|------|------|
| NBP9401 | SCS<br>(Paper<br>only) | 50 in <sup>3</sup> GI<br>air gun |  |  |  | 1994 | 4100 |
| NBP9501 | SCS<br>(Paper<br>only) | 50 in <sup>3</sup> GI<br>air gun |  |  |  | 1995 | 3041 |
| NBP9902 | SCS<br>(Paper<br>only) |                                  |  |  |  | 1999 | 935  |

**Supplemental Table 2: Seismic refraction solutions for sonobuoy measurements. Modified from Cochrane et al., 1992**

| <b>Sonobuoy No</b> | <b>Expedition</b> | <b>Latitude</b> | <b>Longitude</b> | <b>Water Depth (m)</b> | <b>Layer 1 Thickness (m)</b> | <b>Layer 1 Velocity (m/s)</b> |
|--------------------|-------------------|-----------------|------------------|------------------------|------------------------------|-------------------------------|
| 2                  | S.P. Lee<br>1984  | -77.19          | 163.93           | 271                    | 500                          | 2090                          |
| 6                  | S.P. Lee<br>1984  | -77.03          | 165.85           | 860                    | 180                          | 1860                          |
| 7                  | S.P. Lee<br>1984  | -77.27          | 163.89           | 945                    | 650                          | 1920                          |
| 9                  | S.P. Lee<br>1984  | -76.65          | 167.72           | 827                    | 30                           | 1920                          |
| 10                 | S.P. Lee<br>1984  | -76.31          | 164.93           | 850                    | 810                          | 1900                          |
| 11                 | S.P. Lee<br>1984  | -75.95          | 163.17           | 728                    | 120                          | 2970                          |
| 12                 | S.P. Lee<br>1984  | -75.96          | 164.82           | 898                    | 900                          | 1930                          |
| 13                 | S.P. Lee<br>1984  | -76.01          | 166.77           | 690                    | 190                          | 1920                          |
| 14                 | S.P. Lee<br>1984  | -76.02          | 169.24           | 569                    | 120                          | 1930                          |
| 15                 | S.P. Lee<br>1984  | -75.77          | 169.03           | 486                    | 90                           | 1910                          |
| 17                 | S.P. Lee<br>1984  | -75.16          | 165.91           | 856                    | 150                          | 1950                          |
| 18                 | S.P. Lee<br>1984  | -75.00          | 167.51           | 525                    | 160                          | 1900                          |
| 19                 | S.P. Lee<br>1984  | -75.02          | 170.94           | 541                    | 20                           | 1930                          |
| 20                 | S.P. Lee<br>1984  | -74.83          | 172.34           | 592                    | 30                           | 2190                          |
| 21                 | S.P. Lee<br>1984  | -74.49          | 170.15           | 465                    | 320                          | 1940                          |
| 22                 | S.P. Lee<br>1984  | -74.13          | 168.75           | 629                    | 200                          | 2280                          |

|    |                        |        |         |      |     |      |
|----|------------------------|--------|---------|------|-----|------|
| 23 | S.P. Lee<br>1984       | -74.05 | 171.25  | 569  | 340 | 1930 |
| 24 | S.P. Lee<br>1984       | -74.02 | 170.20  | 557  | 290 | 1920 |
| 26 | S.P. Lee<br>1984       | -74.31 | 169.09  | 695  | 190 | 1930 |
| 27 | S.P. Lee<br>1984       | -74.69 | 167.45  | 825  | 420 | 2210 |
| 28 | S.P. Lee<br>1984       | -75.20 | 166.20  | 873  | 110 | 1790 |
| 29 | S.P. Lee<br>1984       | -75.99 | 164.93  | 918  | 460 | 1720 |
| 30 | S.P. Lee<br>1984       | -76.43 | 164.92  | 808  | 150 | 1790 |
| 31 | S.P. Lee<br>1984       | -76.93 | 165.00  | 565  | 140 | 1780 |
| 32 | S.P. Lee<br>1984       | -72.55 | -178.31 | 554  | 160 | 1920 |
| 33 | S.P. Lee<br>1984       | -72.53 | -175.95 | 818  | 270 | 1970 |
| 34 | S.P. Lee<br>1984       | -72.52 | -173.60 | 3344 | 490 | 1790 |
| 35 | S.P. Lee<br>1984       | -72.13 | -177.29 | 700  | 180 | 1920 |
| 37 | S.P. Lee<br>1984       | -72.10 | 179.30  | 2218 | 690 | 1800 |
| 38 | S.P. Lee<br>1984       | -71.38 | 174.90  | 2330 | 550 | 1700 |
| 39 | S.P. Lee<br>1984       | -70.72 | 175.28  | 2416 | 310 | 1700 |
| 44 | Polar<br>Queen<br>1988 | -76.00 | 177.22  | 466  | 90  | 1900 |
| 45 | Polar<br>Queen<br>1988 | -76.00 | 175.48  | 569  | 420 | 1900 |
| 46 | Polar<br>Queen<br>1988 | -76.00 | 173.90  | 533  | 360 | 1900 |
| 47 | Polar<br>Queen<br>1988 | -76.00 | 172.25  | 600  | 320 | 1900 |
| 48 | Polar<br>Queen<br>1988 | -76.00 | 170.59  | 690  | 140 | 1930 |



|    |                  |        |         |      |     |      |
|----|------------------|--------|---------|------|-----|------|
| 50 | Polar Queen 1988 | -75.60 | 173.34  | 503  | 290 | 1900 |
| 51 | Polar Queen 1988 | -76.12 | 173.33  | 630  | 290 | 1900 |
| 52 | Polar Queen 1988 | -76.42 | 173.34  | 578  | 430 | 1900 |
| 53 | Polar Queen 1988 | -75.41 | 165.20  | 451  | 780 | 2360 |
| 54 | Polar Queen 1988 | -75.01 | 165.50  | 1103 | 210 | 1900 |
| 55 | Polar Queen 1988 | -75.39 | 176.51  | 361  | 590 | 1900 |
| 56 | Polar Queen 1988 | -75.29 | 174.92  | 293  | 400 | 1900 |
| 57 | Polar Queen 1988 | -75.22 | 173.43  | 480  | 350 | 1900 |
| 59 | Polar Queen 1988 | -75.01 | 171.40  | 577  | 80  | 1900 |
| 60 | Polar Queen 1988 | -75.18 | -175.25 | 317  | 820 | 1800 |
| 61 | Polar Queen 1988 | -74.76 | -175.26 | 279  | 920 | 1800 |
| 62 | Polar Queen 1988 | -74.31 | -175.24 | 433  | 640 | 1800 |
| 63 | Polar Queen 1988 | -73.75 | -175.24 | 395  | 660 | 1800 |
| 61 | Polar Queen 1988 | -74.63 | 168.24  | 580  | 440 | 1930 |
| 62 | Polar Queen 1988 | -73.97 | 171.51  | 493  | 350 | 1900 |

|    |                     |        |         |      |     |      |
|----|---------------------|--------|---------|------|-----|------|
| 63 | Polar Queen<br>1988 | -74.52 | 171.50  | 428  | 210 | 1900 |
| 64 | OGS Explora<br>1989 | -75.47 | 174.00  | 297  | 410 | 1900 |
| 65 | OGS Explora<br>1989 | -75.28 | 172.21  | 522  | 120 | 1900 |
| 66 | OGS Explora<br>1989 | -75.29 | 170.01  | 370  | 260 | 1900 |
| 67 | OGS Explora<br>1989 | -75.47 | 173.33  | 442  | 420 | 1900 |
| 68 | OGS Explora<br>1989 | -75.38 | 175.25  | 319  | 470 | 1900 |
| 69 | OGS Explora<br>1989 | -73.53 | 178.60  | 334  | 200 | 1900 |
| 70 | OGS Explora<br>1989 | -73.58 | -177.39 | 1014 | 620 | 1870 |
| 71 | OGS Explora<br>1989 | -74.38 | -178.97 | 303  | 800 | 2010 |
| 72 | OGS Explora<br>1989 | -76.37 | -176.09 | 580  | 340 | 1930 |
| 74 | OGS Explora<br>1989 | -77.45 | -174.00 | 544  | 240 | 1900 |
| 75 | OGS Explora<br>1989 | -77.45 | -178.50 | 525  | 60  | 2220 |
| 76 | OGS Explora<br>1989 | -77.45 | -178.51 | 660  | 290 | 1830 |
| 77 | OGS Explora<br>1989 | -77.12 | -178.69 | 638  | 210 | 1900 |
| 78 | OGS Explora<br>1989 | -76.33 | -179.76 | 371  | 130 | 1900 |

|    |                        |        |        |     |     |      |
|----|------------------------|--------|--------|-----|-----|------|
| 79 | OGS<br>Explora<br>1989 | -76.29 | 177.00 | 443 | 470 | 1900 |
| 80 | OGS<br>Explora<br>1989 | -75.44 | 177.00 | 404 | 450 | 1900 |
| 81 | OGS<br>Explora<br>1989 | -73.72 | 176.98 | 372 | 10  | 2150 |
| 87 | OGS<br>Explora<br>1990 | -74.88 | 165.48 | 782 | 470 | 1800 |
| 88 | OGS<br>Explora<br>1990 | -74.97 | 164.71 | 920 | 270 | 1800 |
| 89 | OGS<br>Explora<br>1990 | -75.07 | 168.11 | 316 | 410 | 1800 |
| 90 | OGS<br>Explora<br>1990 | -75.04 | 164.92 | 929 | 280 | 1800 |
| 91 | OGS<br>Explora<br>1990 | -75.37 | 166.65 | 476 | 410 | 1800 |
| 92 | OGS<br>Explora<br>1990 | -75.91 | 166.35 | 507 | 410 | 1800 |
| 93 | OGS<br>Explora<br>1990 | -76.05 | 164.92 | 883 | 980 | 1800 |
| 94 | OGS<br>Explora<br>1990 | -75.93 | 163.79 | 730 | 390 | 1800 |
| 95 | OGS<br>Explora<br>1990 | -75.84 | 164.67 | 773 | 880 | 1800 |
| 96 | OGS<br>Explora<br>1990 | -75.92 | 163.72 | 697 | 410 | 1800 |
| 97 | OGS<br>Explora<br>1990 | -75.94 | 163.96 | 714 | 340 | 1800 |
| 98 | OGS<br>Explora<br>1990 | -75.92 | 164.21 | 681 | 430 | 1800 |

|     |                        |        |        |      |     |      |
|-----|------------------------|--------|--------|------|-----|------|
| 99  | OGS<br>Explora<br>1990 | -76.99 | 164.78 | 440  | 740 | 1800 |
| 100 | OGS<br>Explora<br>1990 | -77.02 | 166.01 | 833  | 950 | 1800 |
| 101 | OGS<br>Explora<br>1990 | -77.14 | 166.30 | 936  | 360 | 1800 |
| 102 | OGS<br>Explora<br>1990 | -77.59 | 164.56 | 263  | 290 | 1800 |
| 103 | OGS<br>Explora<br>1990 | -76.95 | 164.41 | 387  | 310 | 1800 |
| 104 | OGS<br>Explora<br>1990 | -77.08 | 166.34 | 933  | 630 | 1800 |
| 105 | OGS<br>Explora<br>1990 | -76.88 | 164.96 | 574  | 560 | 1800 |
| 106 | OGS<br>Explora<br>1990 | -76.53 | 166.26 | 630  | 410 | 1800 |
| 107 | OGS<br>Explora<br>1990 | -70.29 | 166.28 | 604  | 360 | 1800 |
| 108 | OGS<br>Explora<br>1990 | -75.03 | 167.75 | 419  | 370 | 1800 |
| 109 | OGS<br>Explora<br>1990 | -74.85 | 166.19 | 1080 | 440 | 1800 |
| 110 | OGS<br>Explora<br>1990 | -75.06 | 169.24 | 370  | 340 | 1800 |
| 111 | OGS<br>Explora<br>1990 | -74.80 | 170.42 | 300  | 490 | 1800 |
| 112 | OGS<br>Explora<br>1990 | -74.56 | 169.15 | 537  | 290 | 1800 |
| 113 | OGS<br>Explora<br>1990 | -63.01 | 166.85 | 2357 | 610 | 1800 |

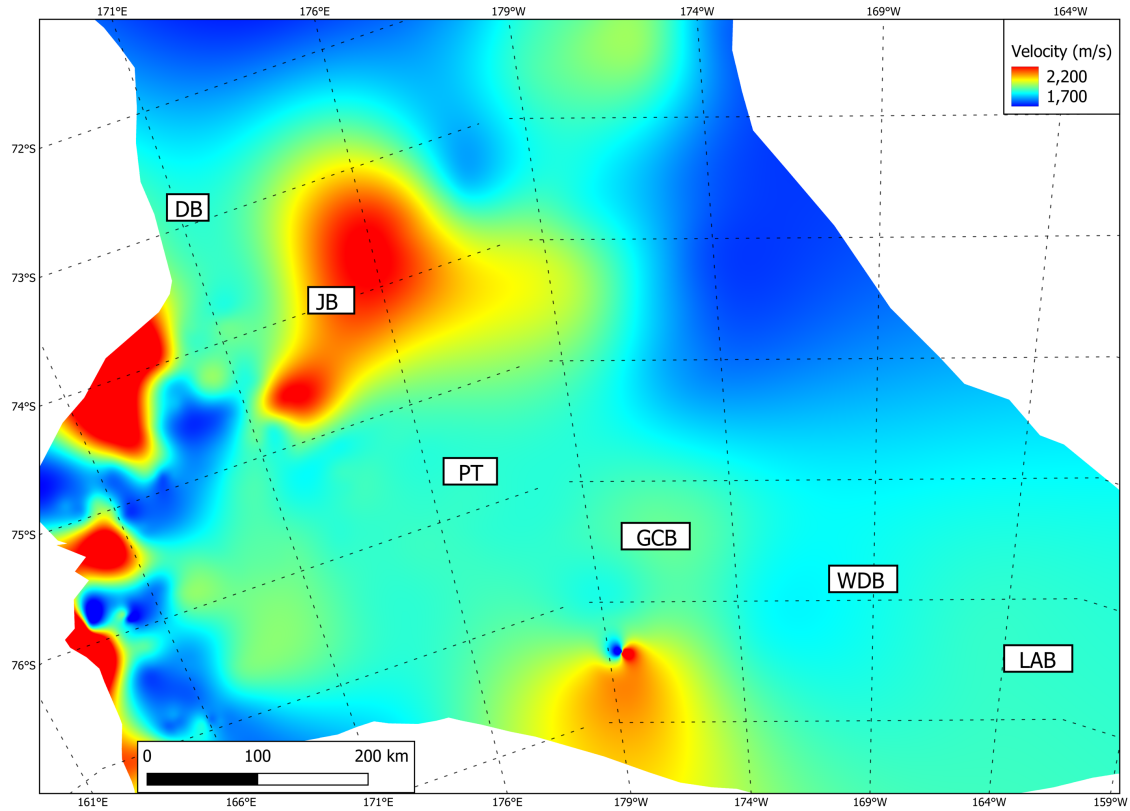

Supplemental Figure 1. Interval velocity map of the Ross Sea created from interpolation of the refraction sonobuoy data reported in Cochrane et al., (1992). Interval velocities varied laterally from 1700 m/s to 2200 m/s within this layer of sediment. This interval velocity map was used as the input to a velocity model constructed in Petrel that was subsequently used for depth conversion of time-thickness maps.

## *Appendix 1: Catalogue of Ross Sea GZWs*

The GZWs mapped in this study match those identified in other regional studies using seismic data and multibeam bathymetry (Supplemental Table 3). In LAB all three of the mapped GZWs (Table 1 and Figure 4: a, b and c) have been previously identified from NBP9902 seismic lines (Mosola and Anderson, 2006). In WDB, the outer shelf and middle shelf GZWs (Table 1 and Figure 4: d and e) have been mapped using surveys such as PD90, NBP9307, NBP9501, NBP9902, NBP0802 and NBP1502 (Mosola and Anderson, 2006; Bart et al., 2017; Danielson and Bart, 2019). The outer shelf and middle shelf GZWs in GCB (Table 1 and Figure 4: f and g) were identified using the surveys PD90, NBP9401, NBP9501, NBP0301A, NBP0802 (Bart and Owolana, 2012). The GCB Inner Reaches East GZW (Table 1 and Figure 4: h) was previously mapped from a regional multibeam bathymetry study (Halberstadt et al., 2016). The two IR of the MCS GZWs in western GCB (Table 1 and Figure 4: i and j) have been identified and mapped for this study. The outer shelf GZW in PT was first identified using the seismic survey of NBP9401 (Table 1 and Figure 4: k). The middle shelf GZWs in JB and DT (Table 1 and Figure 4: l and o) were first identified using the seismic surveys of NBP9401 and NBP9501 (Shipp et al., 1999). The IR JOIDES GZW near Franklin Island (Table 1 and Figure 4: m) has been identified from multibeam bathymetry and has been cored (Halberstadt et al., 2016; Prothro et al., 2020). The remaining GZWs in the IR of the MCS of JB and DB (Table 1 and Figure 4: n, p, q) have been identified and mapped for this study.

**Supplemental Table 3: Catalogue of Ross Sea Grounding zone wedges**

| GZW Wedge Location                | References                                   |
|-----------------------------------|----------------------------------------------|
| a. LAB Outer Shelf                | Mosola and Anderson, 2006                    |
| b. LAB Middle Shelf               | Mosola and Anderson, 2006                    |
| c. LAB Middle Shelf Inner Reaches | Mosola and Anderson, 2006                    |
| d. WDB Outer Shelf                | Bart et al., 2017; Mosola and Anderson, 2006 |
| e. WDB Middle Shelf               | Bart et al., 2017; Mosola and Anderson, 2006 |
| f. GCB Outer Shelf                | Bart and Owolana, 2012                       |
| g. GCB Middle Shelf West          | Bart and Owolana, 2012                       |
| h. GCB Inner Reaches East         | Halberstadt et al., 2016                     |
| i. GCB Inner Reaches West         | This study                                   |
| j. GCB Inner Reaches Ross Bank    | This study                                   |
| k. PT Middle Shelf                | Shipp et al., 1999                           |

|                           |                                                |
|---------------------------|------------------------------------------------|
| I. JOIDES Middle Shelf    | Shipp et al., 1999                             |
| m. JOIDES Inner Reaches 1 | Halberstadt et al., 2016; Prothro et al., 2020 |
| n. JOIDES Inner Reaches 2 | This study                                     |
| o. DT Outer Shelf         | Shipp et al., 1999                             |
| p. DT Inner Reaches 1     | Baroni et al., 2022                            |
| q. DT Inner Reaches 2     | Baroni et al., 2022                            |



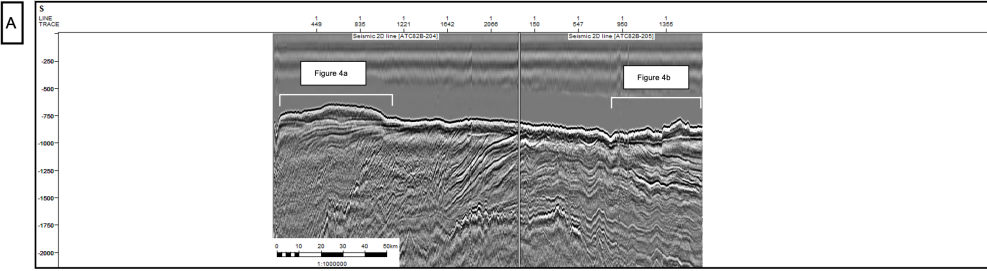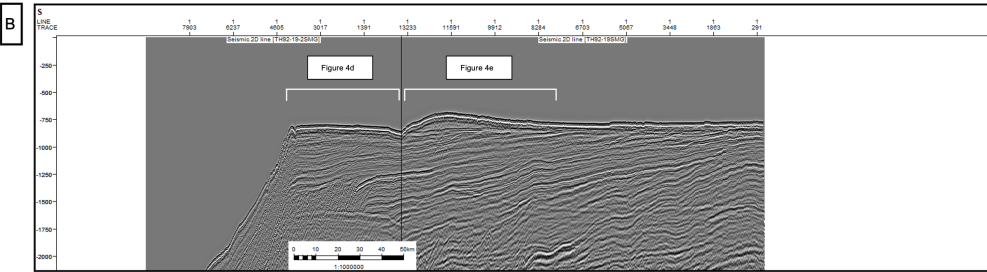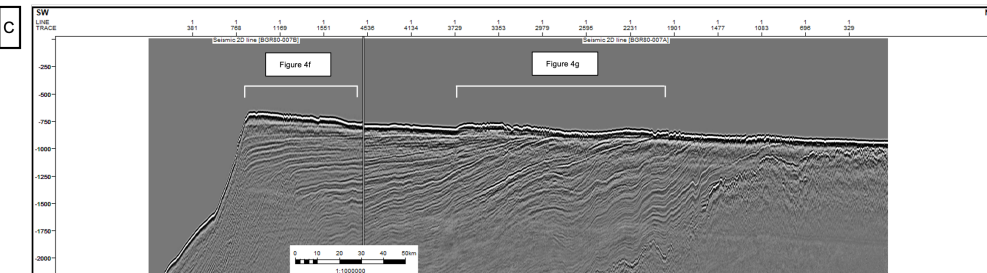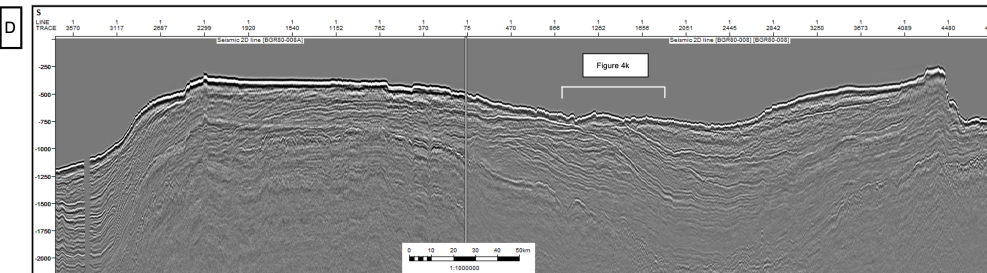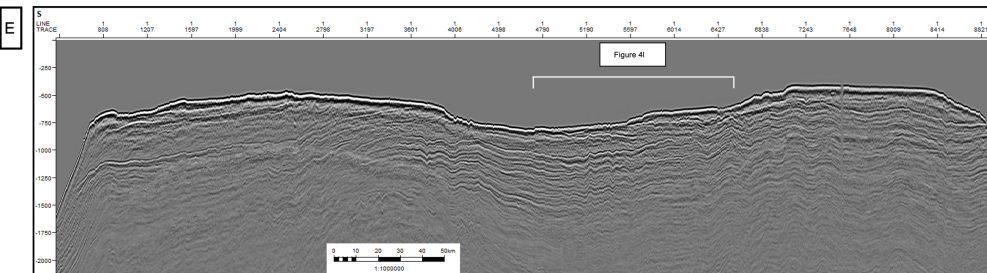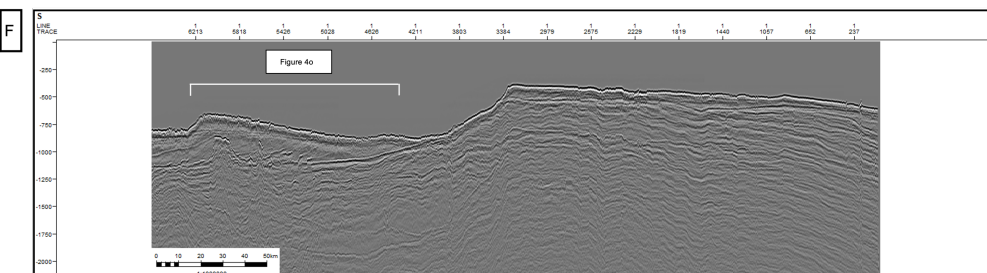

Supplemental Figure 2. Collection of composite seismic lines in major troughs of Ross Sea that show the major trough GZWs in Ross Sea. Positions indicated in Figure 1 with A corresponding with LAB, B with WDB, C with GCB, D with PT, E with JB and F with DT. GZWs from Figure 4 are labeled where present along the cross sections.
